# Supplementary material for: Self-doping inspired zwitterionic pendant design of radical polymers toward a rocking-chair-type organic cathode-active material
Source: Royal Society of Chemistry journal article supplement (doi:10.1039/c2ta00785a), 2012-11-14
Supplement: c2ta00785a.pdf [file c2ta00785a.pdf]

*Electronic Supplementary Information*

**Self-doping Inspired Zwitterionic Pendant Design of  
Radical Polymers toward a Rocking-chair-type  
Organic Cathode-active Material**

By *Il Seok Chae, Masafumi Koyano, Kenichi Oyaizu and Hiroyuki Nishide\**

**Contents:**

1. DOSY of **1**, **2** and **1/2** (1:1, 1:4 mol. ratio) (**Figure S1**)
2. NOESY NMR for the mixture of PTMA and TBAOH (**Figure S2**)
3. DOSY of **4** (**Figure S3**)
4. Characterization of the radical polymer: ESR and SQUID (**Figure S4, S5**)
5. Cyclic voltammograms and EQCM of PTMA (**Figure S6**)
6. Diffusion coefficient of TEMPO/poly (sodium form vinylsulfonate) aqueous (**Figure S7**)
7. Crystal data for the monomer complex (**Table S1~S8**)

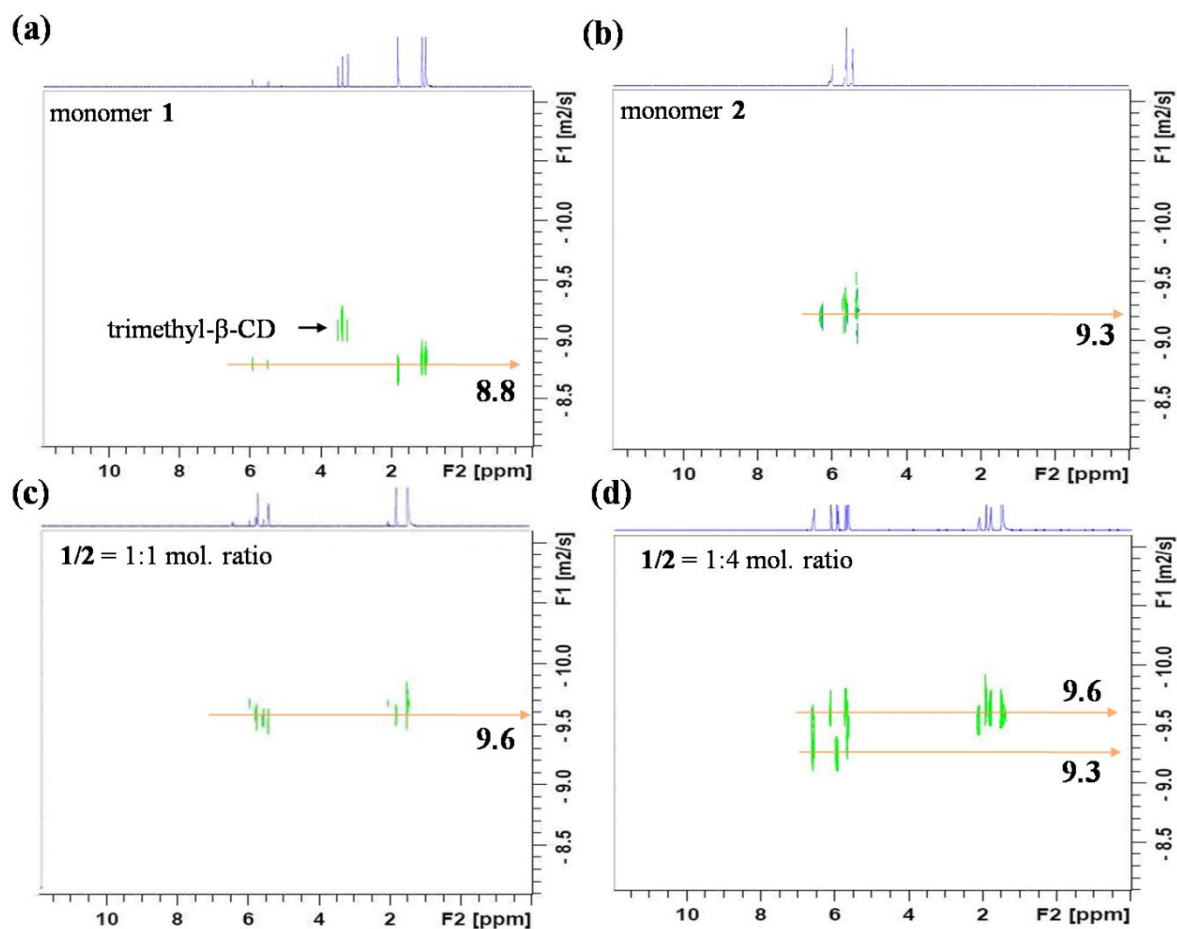

**Figure S1.** DOSY NMR of monomers in D<sub>2</sub>O/MeOH-*d*<sub>4</sub> (1/1, v/v). Since **2** could reaction with cyclodextrin compounds, trimethyl-β-cyclodextrin (reference) was only introduced to **1** as shown in (a).

The diffusion coefficient (DC) of **1** and **2** was observed 8.8 and 9.3, respectively. Although the molecular weight of **1** was larger than **2**, the DC of **2** was observed a higher value due to the ionic character (SO<sub>3</sub><sup>-</sup>). In the same mol. ratio of **1/2**, the diffusion coefficient of both monomers was increased and had the same DC as shown in (c). This was due to the ionic interaction of [**1**<sup>+</sup>][**2**<sup>-</sup>]. In the case of 1/2=1:4 (mol. ratio), two DC were observed in (d). The reason was 3 mol ratio of **2** could not complex with **1**. Therefore, the complex form showed the same value of (c), and the others showed the (b).

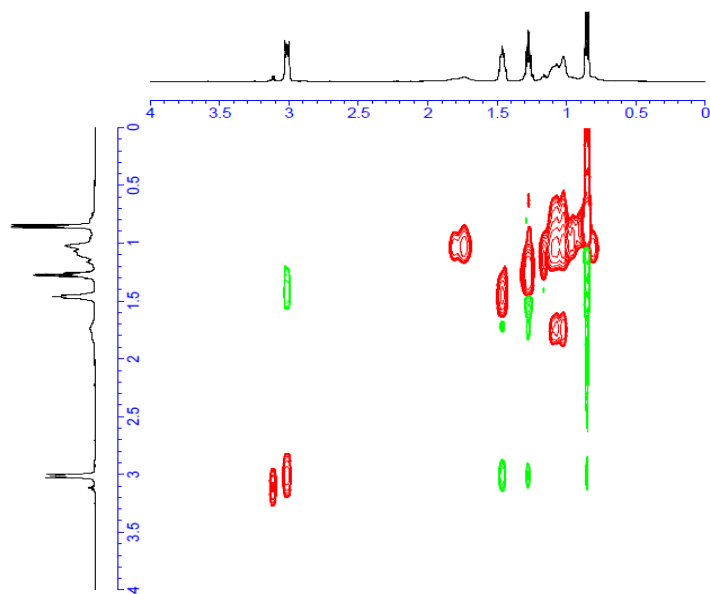

**Figure S2.** NOESY NMR for the mixture state of PTMA and TBAOH.

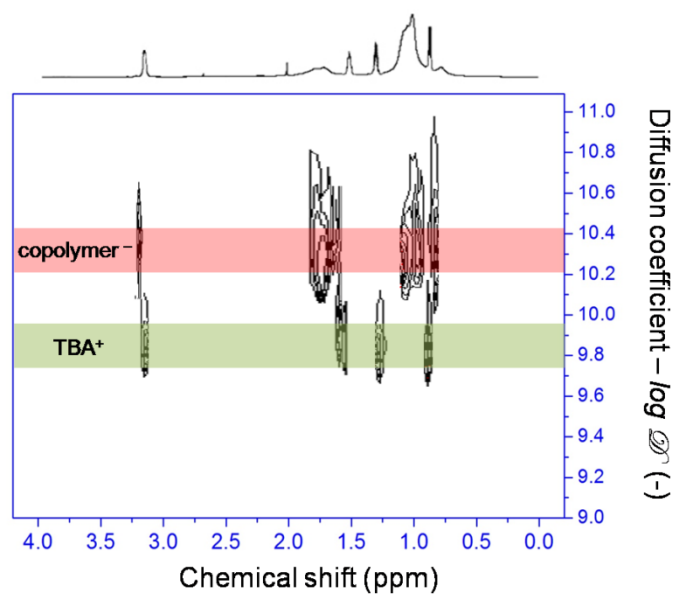

**Figure S3.** DOSY NMR of the poly(TEMPO-methacrylate-*stat*-TBA form vinyl sulfonate)

#### 4. Characterization of the radical polymer

The TEMPO radical moiety of the **5** was characterized by ESR spectroscopy and SQUID magnetic measurements. The **5** gave a single broad ESR at  $g = 2.0070$  (**Figure S4**) corresponding to that of TEMPO (2.0056). The broadening of the ESR spectrum was due to the spin exchange interaction between the unpaired electrons of the neighboring TEMPO radical group.

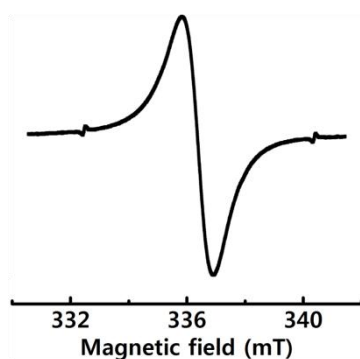

**Figure S4.** ESR spectrum of **5**

Magnetic susceptibilities of **5** were determined by SQUID measurements at 0.5 T and various temperatures ranging between 1.95 and 300 K. The Curie constant  $\chi T$  at sufficiently high temperatures (i.e.  $2J \ll kT$ ) corresponded to the value of 0.375 emu K mol<sup>-1</sup> calculated for a spin quantum number of  $S = 1/2$ , which supported the paramagnetic property of the radical polymers. The deviation of  $\chi T$  to lower values at low temperatures indicated a weak antiferromagnetic interaction within the polymers, as typically shown for **5** (**Figure S4**). The radical concentration was determined from the  $1/\chi$  vs.  $T$  plots, based on the Curie-Weiss rule according to  $1/\chi_{\text{para}} = T/C - \theta/C$  Where  $C$  is a Curie constant defined as  $N_e g^2 \mu_B^2 S(S + 1)/(3k)$ . The slope of the  $1/\chi$  vs.  $T$  plots ( $1/C$ ) gave a spin density ( $N_e$ ) of  $2.53 \times 10^{21}$  spin/g for **5** (**Figure S5**), which amounted to 92.3% of the TEMPO unit in the polymer.

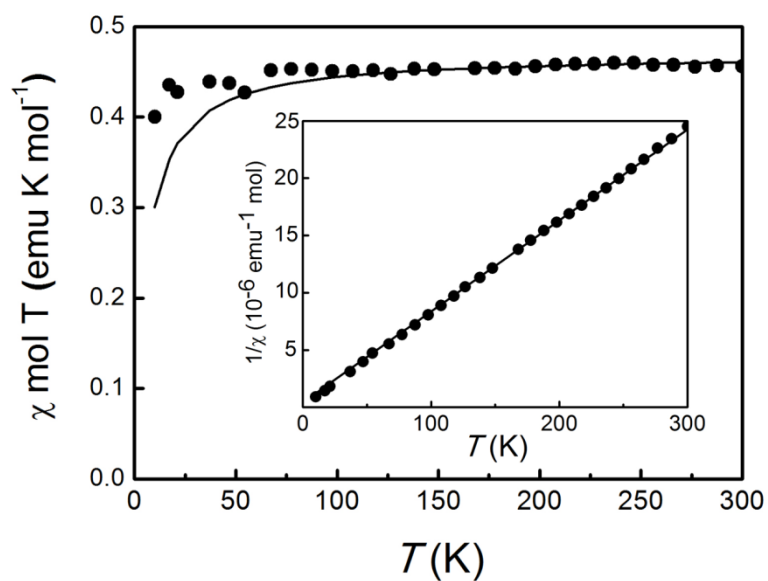

**Figure S5.** Plots of 1/magnetic susceptibility (22 mg) vs. temperature (Curie-Weiss plots) for **5**. Inset: SQUID measurements.

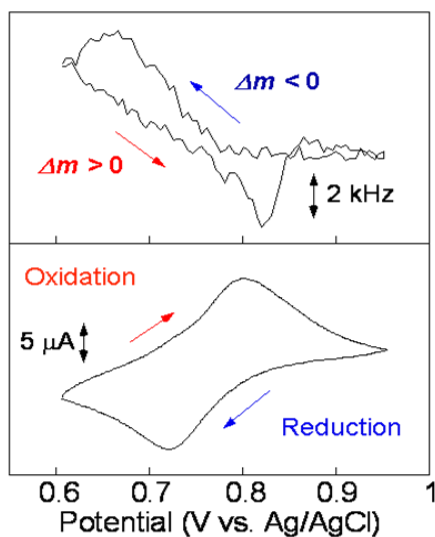

**Figure S6.** Cyclic voltammograms and EQCM of PTMA in water/MeCN = 1/1 (v/v) with 0.1 M LiPF<sub>6</sub>.

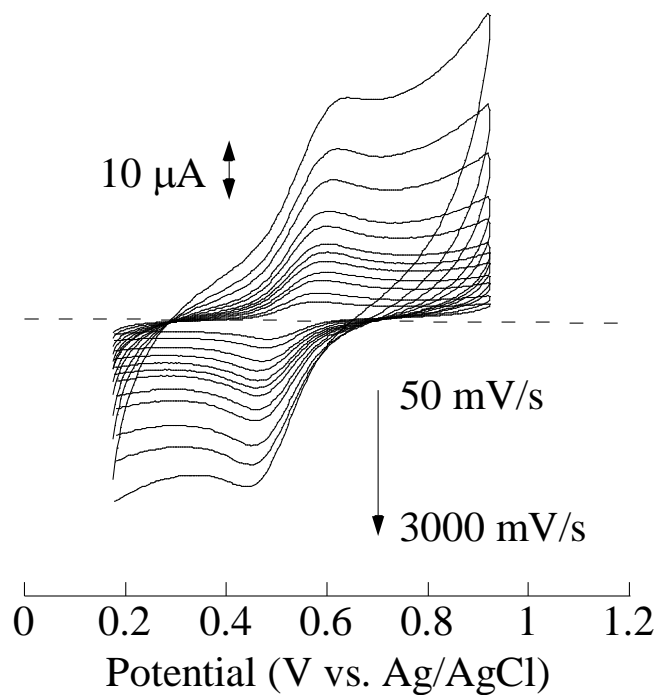

**Figure S7.** Cyclic voltammograms of 5 mM TEMPO in 0.1 M (unit) PVSA -Na aq at 50-3000 mV/s. Diffusion coefficient and kinetic constant was  $9.48 \times 10^{-6} \text{ cm}^2/\text{s}$  and  $5.46 \times 10^{-3} \text{ cm/s}$  respectively.

**Table S1.** Atomic coordinates and  $B_{iso}/B_{eq}$

| atom | x          | y         | z         | $B_{eq}$ |
|------|------------|-----------|-----------|----------|
| S1   | 0.2579(2)  | 0.9214(1) | 1.2105(1) | 2.68(4)  |
| O2   | 0.2630(4)  | 0.8166(4) | 1.1155(3) | 3.11(7)  |
| O3   | 0.2176(6)  | 0.5018(4) | 0.7813(4) | 4.43(9)  |
| O4   | 0.1352(5)  | 0.9884(4) | 1.1512(4) | 4.08(8)  |
| O5   | 0.4282(5)  | 1.0158(4) | 1.2930(4) | 4.26(8)  |
| O6   | 0.1692(7)  | 0.4394(6) | 0.5818(4) | 6.8(2)   |
| N7   | 0.0289(5)  | 0.8169(4) | 0.8686(4) | 2.37(7)  |
| C8   | 0.3430(6)  | 0.3410(5) | 0.7212(5) | 2.67(9)  |
| C9   | 0.1627(6)  | 0.8566(5) | 0.8051(5) | 2.60(8)  |
| C10  | 0.2534(7)  | 0.7473(5) | 0.8103(6) | 2.98(9)  |
| C11  | 0.2378(7)  | 0.4317(5) | 0.6853(5) | 3.4(1)   |
| C12  | -0.1053(6) | 0.6707(5) | 0.8294(5) | 2.85(9)  |
| C13  | -0.2441(7) | 0.6462(5) | 0.7011(5) | 3.4(1)   |
| C14  | 0.0733(8)  | 0.8676(6) | 0.6727(5) | 3.9(1)   |
| C15  | -0.0045(8) | 0.5676(6) | 0.8333(6) | 3.6(1)   |
| C16  | -0.1888(8) | 0.6629(6) | 0.9279(6) | 3.6(1)   |
| C17  | 0.2919(7)  | 1.0008(6) | 0.8831(6) | 3.5(1)   |
| C18  | 0.1195(8)  | 0.5980(6) | 0.7595(6) | 3.8(1)   |
| C19  | 0.4229(7)  | 0.3455(5) | 0.8404(6) | 3.7(1)   |
| C20  | 0.1620(7)  | 0.8262(5) | 1.3000(5) | 3.5(1)   |
| C21  | 0.2420(9)  | 0.8295(7) | 1.4163(6) | 4.8(2)   |
| C22  | 0.356(1)   | 0.2482(7) | 0.6167(7) | 5.7(2)   |

$$B_{eq} = 8/3 \pi^2 (U_{11}(aa^*)^2 + U_{22}(bb^*)^2 + U_{33}(cc^*)^2 + 2U_{12}(aa^*bb^*)\cos \gamma + 2U_{13}(aa^*cc^*)\cos \beta + 2U_{23}(bb^*cc^*)\cos \alpha)$$

**Table S2.** Atomic coordinates and  $B_{iso}$  involving hydrogen atoms

| atom | x       | y      | z      | $B_{iso}$ |
|------|---------|--------|--------|-----------|
| H7   | 0.0847  | 0.8232 | 0.9432 | 3.66      |
| H10A | 0.3206  | 0.7494 | 0.8962 | 2.93      |
| H10B | 0.3119  | 0.7581 | 0.7615 | 3.58      |
| H13A | -0.2818 | 0.7279 | 0.6964 | 4.06      |
| H13B | -0.3454 | 0.5628 | 0.6872 | 4.06      |
| H13C | -0.1945 | 0.6320 | 0.6371 | 4.06      |
| H14A | -0.0084 | 0.7749 | 0.6216 | 4.64      |
| H14B | 0.1625  | 0.9026 | 0.6371 | 4.64      |
| H14C | 0.0084  | 0.9324 | 0.6742 | 4.64      |
| H15A | 0.0593  | 0.5728 | 0.9287 | 3.07      |
| H15B | -0.0908 | 0.4716 | 0.8028 | 4.90      |
| H16A | -0.2435 | 0.7244 | 0.9183 | 2.64      |
| H16B | -0.0971 | 0.6875 | 1.0154 | 3.10      |
| H16C | -0.2665 | 0.5783 | 0.9080 | 5.19      |
| H17A | 0.3405  | 0.9900 | 0.9667 | 4.18      |
| H17B | 0.3951  | 1.0331 | 0.8534 | 5.48      |
| H17C | 0.2335  | 1.0762 | 0.8763 | 3.84      |
| H18  | 0.0523  | 0.5857 | 0.6662 | 4.63      |
| H19A | 0.3352  | 0.3213 | 0.8791 | 4.41      |
| H19B | 0.5071  | 0.4402 | 0.8833 | 4.41      |
| H19C | 0.4854  | 0.2783 | 0.8468 | 4.41      |
| H20  | 0.0421  | 0.7675 | 1.2607 | 4.20      |
| H21A | 0.3620  | 0.8869 | 1.4589 | 5.72      |
| H21B | 0.1806  | 0.7744 | 1.4587 | 5.72      |
| H22A | 0.4234  | 0.1888 | 0.6344 | 6.81      |
| H22B | 0.2960  | 0.2487 | 0.5327 | 6.81      |



**Table S3.** Anisotropic displacement parameters

| atom | U <sub>11</sub> | U <sub>22</sub> | U <sub>33</sub> | U <sub>12</sub> | U <sub>13</sub> | U <sub>23</sub> |
|------|-----------------|-----------------|-----------------|-----------------|-----------------|-----------------|
| S1   | 0.0273(7)       | 0.0323(7)       | 0.0416(7)       | 0.0133(5)       | 0.0125(5)       | -0.0005(5)      |
| O2   | 0.040(2)        | 0.045(2)        | 0.039(2)        | 0.026(2)        | 0.015(2)        | 0.003(2)        |
| O3   | 0.070(3)        | 0.054(3)        | 0.054(3)        | 0.043(2)        | 0.021(2)        | 0.006(2)        |
| O4   | 0.058(3)        | 0.049(2)        | 0.064(3)        | 0.038(2)        | 0.025(2)        | 0.014(2)        |
| O5   | 0.037(2)        | 0.054(3)        | 0.053(3)        | 0.002(2)        | 0.014(2)        | -0.009(2)       |
| O6   | 0.112(4)        | 0.106(4)        | 0.046(3)        | 0.089(4)        | 0.002(3)        | -0.006(3)       |
| N7   | 0.025(2)        | 0.027(2)        | 0.034(3)        | 0.007(2)        | 0.011(2)        | -0.002(2)       |
| C8   | 0.027(3)        | 0.026(3)        | 0.043(3)        | 0.009(2)        | 0.009(2)        | 0.001(2)        |
| C9   | 0.031(3)        | 0.029(3)        | 0.044(3)        | 0.014(2)        | 0.020(2)        | 0.006(2)        |
| C10  | 0.036(3)        | 0.042(3)        | 0.042(3)        | 0.022(3)        | 0.016(3)        | 0.006(3)        |
| C11  | 0.035(3)        | 0.041(3)        | 0.048(3)        | 0.015(3)        | 0.013(3)        | -0.000(3)       |
| C12  | 0.031(3)        | 0.025(3)        | 0.047(3)        | 0.008(2)        | 0.012(2)        | -0.002(2)       |
| C13  | 0.033(3)        | 0.034(3)        | 0.048(3)        | 0.009(2)        | 0.006(3)        | -0.006(2)       |
| C14  | 0.058(4)        | 0.062(4)        | 0.047(3)        | 0.039(3)        | 0.028(3)        | 0.016(3)        |
| C15  | 0.051(4)        | 0.029(3)        | 0.054(4)        | 0.020(3)        | 0.011(3)        | 0.000(3)        |
| C16  | 0.039(3)        | 0.036(3)        | 0.056(4)        | 0.002(3)        | 0.021(3)        | 0.003(3)        |
| C17  | 0.037(3)        | 0.035(3)        | 0.071(4)        | 0.014(3)        | 0.030(3)        | 0.012(3)        |
| C18  | 0.058(4)        | 0.042(3)        | 0.051(4)        | 0.032(3)        | 0.020(3)        | 0.005(3)        |
| C19  | 0.038(3)        | 0.033(3)        | 0.067(4)        | 0.008(3)        | 0.021(3)        | 0.009(3)        |
| C20  | 0.040(3)        | 0.040(3)        | 0.049(3)        | 0.012(3)        | 0.019(3)        | -0.003(3)       |
| C21  | 0.067(4)        | 0.064(4)        | 0.048(4)        | 0.016(4)        | 0.029(3)        | 0.002(3)        |
| C22  | 0.087(5)        | 0.081(5)        | 0.061(4)        | 0.066(4)        | 0.018(4)        | 0.001(4)        |

The general temperature factor expression:  $\exp(-2\pi^2(a^2U_{11}h^2 + b^2U_{22}k^2 + c^2U_{33}l^2 + 2a*b*U_{12}hk + 2a*c*U_{13}hl + 2b*c*U_{23}kl))$

**Table S4.** Bond lengths (Å)

| atom | atom | distance  | atom | atom | distance  |
|------|------|-----------|------|------|-----------|
| S1   | O2   | 1.459(4)  | S1   | O4   | 1.454(5)  |
| S1   | O5   | 1.433(3)  | S1   | C20  | 1.747(7)  |
| O3   | C11  | 1.335(8)  | O3   | C18  | 1.460(9)  |
| O6   | C11  | 1.185(8)  | N7   | C9   | 1.537(8)  |
| N7   | C12  | 1.512(5)  | C8   | C11  | 1.475(8)  |
| C8   | C19  | 1.326(8)  | C8   | C22  | 1.496(10) |
| C9   | C10  | 1.527(8)  | C9   | C14  | 1.522(8)  |
| C9   | C17  | 1.524(6)  | C10  | C18  | 1.532(7)  |
| C12  | C13  | 1.521(7)  | C12  | C15  | 1.535(9)  |
| C12  | C16  | 1.528(10) | C15  | C18  | 1.552(11) |
| C20  | C21  | 1.299(8)  |      |      |           |

**Table S5.** Bond lengths involving hydrogens (Å)

| atom | atom | distance | atom | atom | distance |
|------|------|----------|------|------|----------|
| N7   | H7   | 0.831    | C10  | H10A | 0.976    |
| C10  | H10B | 0.864    | C13  | H13A | 0.980    |
| C13  | H13B | 0.980    | C13  | H13C | 0.980    |
| C14  | H14A | 0.980    | C14  | H14B | 0.980    |
| C14  | H14C | 0.980    | C15  | H15A | 1.057    |
| C15  | H15B | 0.986    | C16  | H16A | 0.882    |
| C16  | H16B | 1.016    | C16  | H16C | 0.878    |
| C17  | H17A | 0.964    | C17  | H17B | 1.030    |
| C17  | H17C | 1.029    | C18  | H18  | 1.027    |
| C19  | H19A | 0.980    | C19  | H19B | 0.980    |
| C19  | H19C | 0.980    | C20  | H20  | 0.950    |
| C21  | H21A | 0.950    | C21  | H21B | 0.950    |
| C22  | H22A | 0.950    | C22  | H22B | 0.950    |

**Table S6.** Bond angles (°)

| atom | atom | atom | angle    | atom | atom | atom | angle    |
|------|------|------|----------|------|------|------|----------|
| O2   | S1   | O4   | 109.3(3) | O2   | S1   | O5   | 113.8(3) |
| O2   | S1   | C20  | 105.3(3) | O4   | S1   | O5   | 115.0(3) |
| O4   | S1   | C20  | 105.3(3) | O5   | S1   | C20  | 107.3(3) |
| C11  | O3   | C18  | 119.2(5) | C9   | N7   | C12  | 120.6(4) |
| C11  | C8   | C19  | 120.6(5) | C11  | C8   | C22  | 116.3(5) |
| C19  | C8   | C22  | 123.1(6) | N7   | C9   | C10  | 107.6(4) |
| N7   | C9   | C14  | 110.8(4) | N7   | C9   | C17  | 104.9(5) |
| C10  | C9   | C14  | 112.9(5) | C10  | C9   | C17  | 111.3(4) |
| C14  | C9   | C17  | 109.0(5) | C9   | C10  | C18  | 111.5(5) |
| O3   | C11  | O6   | 121.4(6) | O3   | C11  | C8   | 113.4(5) |
| O6   | C11  | C8   | 125.1(6) | N7   | C12  | C13  | 110.9(4) |
| N7   | C12  | C15  | 107.2(4) | N7   | C12  | C16  | 105.3(4) |
| C13  | C12  | C15  | 112.4(5) | C13  | C12  | C16  | 110.4(5) |
| C15  | C12  | C16  | 110.4(5) | C12  | C15  | C18  | 111.8(5) |
| O3   | C18  | C10  | 107.4(5) | O3   | C18  | C15  | 105.5(5) |
| C10  | C18  | C15  | 111.6(5) | S1   | C20  | C21  | 125.0(5) |

**Table S7.** Bond angles involving hydrogens (°)

| atom | atom | atom | angle | atom | atom | atom | angle |
|------|------|------|-------|------|------|------|-------|
| C9   | N7   | H7   | 107.7 | C12  | N7   | H7   | 102.0 |
| C9   | C10  | H10A | 111.4 | C9   | C10  | H10B | 108.0 |
| C18  | C10  | H10A | 103.9 | C18  | C10  | H10B | 106.0 |
| H10A | C10  | H10B | 115.8 | C12  | C13  | H13A | 109.5 |
| C12  | C13  | H13B | 109.5 | C12  | C13  | H13C | 109.5 |
| H13A | C13  | H13B | 109.5 | H13A | C13  | H13C | 109.5 |
| H13B | C13  | H13C | 109.5 | C9   | C14  | H14A | 109.5 |
| C9   | C14  | H14B | 109.5 | C9   | C14  | H14C | 109.5 |
| H14A | C14  | H14B | 109.5 | H14A | C14  | H14C | 109.5 |
| H14B | C14  | H14C | 109.5 | C12  | C15  | H15A | 106.2 |
| C12  | C15  | H15B | 108.2 | C18  | C15  | H15A | 114.7 |
| C18  | C15  | H15B | 112.9 | H15A | C15  | H15B | 102.3 |
| C12  | C16  | H16A | 103.8 | C12  | C16  | H16B | 111.8 |
| C12  | C16  | H16C | 107.3 | H16A | C16  | H16B | 111.5 |
| H16A | C16  | H16C | 109.4 | H16B | C16  | H16C | 112.6 |
| C9   | C17  | H17A | 106.2 | C9   | C17  | H17B | 111.2 |
| C9   | C17  | H17C | 111.8 | H17A | C17  | H17B | 107.0 |
| H17A | C17  | H17C | 114.4 | H17B | C17  | H17C | 106.2 |
| O3   | C18  | H18  | 112.0 | C10  | C18  | H18  | 107.8 |
| C15  | C18  | H18  | 112.6 | C8   | C19  | H19A | 109.5 |
| C8   | C19  | H19B | 109.5 | C8   | C19  | H19C | 109.5 |
| H19A | C19  | H19B | 109.5 | H19A | C19  | H19C | 109.5 |
| H19B | C19  | H19C | 109.5 | S1   | C20  | H20  | 117.5 |
| C21  | C20  | H20  | 117.5 | C20  | C21  | H21A | 120.0 |
| C20  | C21  | H21B | 120.0 | H21A | C21  | H21B | 120.0 |
| C8   | C22  | H22A | 120.0 | C8   | C22  | H22B | 120.0 |
| H22A | C22  | H22B | 120.0 |      |      |      |       |

**Table S8.** Torsion Angles(°)

(Those having bond angles > 160 or < 20 degrees are excluded.)

| atom1 | atom2 | atom3 | atom4 | angle     | atom1 | atom2 | atom3 | atom4 | angle     |
|-------|-------|-------|-------|-----------|-------|-------|-------|-------|-----------|
| O2    | S1    | C20   | C21   | 113.5(5)  | O4    | S1    | C20   | C21   | -131.1(5) |
| O5    | S1    | C20   | C21   | -8.1(6)   | C11   | O3    | C18   | C10   | -105.8(5) |
| C11   | O3    | C18   | C15   | 135.1(4)  | C18   | O3    | C11   | O6    | -4.6(7)   |
| C18   | O3    | C11   | C8    | 178.6(4)  | C9    | N7    | C12   | C13   | -71.3(6)  |
| C9    | N7    | C12   | C15   | 51.8(5)   | C9    | N7    | C12   | C16   | 169.3(4)  |
| C12   | N7    | C9    | C10   | -52.2(5)  | C12   | N7    | C9    | C14   | 71.7(5)   |
| C12   | N7    | C9    | C17   | -170.8(4) | C19   | C8    | C11   | O3    | -7.1(7)   |
| C19   | C8    | C11   | O6    | 176.2(5)  | C22   | C8    | C11   | O3    | 174.0(5)  |
| C22   | C8    | C11   | O6    | -2.7(8)   | N7    | C9    | C10   | C18   | 51.9(5)   |
| C14   | C9    | C10   | C18   | -70.7(6)  | C17   | C9    | C10   | C18   | 166.3(5)  |
| C9    | C10   | C18   | O3    | -173.7(5) | C9    | C10   | C18   | C15   | -58.6(6)  |
| N7    | C12   | C15   | C18   | -51.5(5)  | C13   | C12   | C15   | C18   | 70.6(5)   |
| C16   | C12   | C15   | C18   | -165.7(3) | C12   | C15   | C18   | O3    | 174.7(3)  |
| C12   | C15   | C18   | C10   | 58.5(5)   |       |       |       |       |           |
